# Supplementary material for: Calculation of external climate costs for food highlights inadequate pricing of animal products
Source: PubMed Central journal article supplement (PMC7738510; doi:10.1038/s41467-020-19474-6), 2020-12-15
Supplement: 41467_2020_19474_MOESM1_ESM.pdf [file 41467_2020_19474_MOESM1_ESM.pdf]

# **Supplementary Information**

**for**

*Calculation of external climate costs for food highlights inadequate*

*pricing of animal products*

**Pieper et al.**

## **Supplementary Note 1**

*Additional information on the determination of emission-differences between conventional and organic production:*

There is not a sufficient number of papers published describing the emission differences of organic and conventional production within the German agricultural landscape only. To broaden the database for following calculations we choose to include studies from a European background. Legislative circumstances describing organic farming are the same in all of Europe. Therefore, values declared as being of organic origin can be compared with each other as the rules and activities of this production practice are clearly defined within European boundaries.

As agricultural production is influenced by climatic conditions, it is to be noted, however, that factors like precipitation or solar radiation do vary between the countries in which selected studies were conducted. However, the climatic conditions within Germany's borders vary strongly as well, especially from north to south. Some regions in Germany can therefore be more closely compared to regions of Ireland, for example, some more to regions of Spain. Since our assessment is designed to describe agricultural production of Germany in general, it is sensible that the climatic differences of the underlying studies also describe the diverse climatic conditions of Germany.

Furthermore, we use the relation between the studies' reported greenhouse gas emissions of organic and conventional agriculture rather than the reported absolute values for further calculations. Climatic conditions within one study, which could result in different emission values compared to an evaluation on German ground, will likely have similar or equal impact on both the agricultural practices assessed within this one study. We therefore argue, that the ratio does not change drastically with climatic conditions. This notion is also supported by the reported values not showing particular tendencies to one or the other direction due to their origin.

Additional information on the respective studies can be found in supplementary table 1.

## Supplementary Note 2

*Additional information on the data gathering in GEMIS:*

A closer look into the mechanisms of GEMIS shall be provided with the example of beef. In GEMIS one can sort through a wide variety of processes. For this explanation, we want to look at the process of beef-production at the stage of slaughtering. This process is labeled with the code: NG-Schlachtereide-Rind-2010, which already gives some indications on the properties of the process. NG stands for 'Nahrungs- und Genussmittel' (english: food and beverage). This is followed by an indication on the stage of production and reference country, whereby Schlachtereide stands for butchery in Germany. Then the actual product (Rind=beef) and the reference year (2010) are listed.

Under this code, all inputs, outputs and the corresponding emissions are listed for one functional unit of the produce (defined as 1 kg of beef-meat). Furthermore, one can read out the compounds of this data-set. In this case, it is the electricity and process-heat for the slaughtering stage, as well as the process of animal-husbandry (including all inputs necessary to raise the animal). Reading out these data-subsets reveals their respective in- and outputs, which themselves consist of even more inputs. By repeating this recursive process, one can read out ever more fine-grained compounds, the further to the beginning of the supply chain one progresses.

Additionally to that, you can find the datasets from GEMIS that we used for our study in supplementary table 2.

## Supplementary Table 1

Included studies and their specifics used for the determination of the emission-difference ( $D_{org/conv}$ ) between organic and conventional production in different countries' contexts through the application of meta-analytical methods (compare table 2 in the main text).

| Source                                                                                                   | Estimation method                                              | Boundaries                                                                       | Regional coverage <sup>1</sup>    | Observed food category        | Emission values [kgCO <sub>2</sub> -eq/ha] |         | difference org/conv |
|----------------------------------------------------------------------------------------------------------|----------------------------------------------------------------|----------------------------------------------------------------------------------|-----------------------------------|-------------------------------|--------------------------------------------|---------|---------------------|
|                                                                                                          |                                                                |                                                                                  |                                   |                               | conventional                               | organic |                     |
| <b>Plant-based</b>                                                                                       |                                                                |                                                                                  |                                   |                               |                                            |         | <b>49%</b>          |
| Aguilera et al. (2015 a) <sup>40</sup><br>p. 719<br>data collected: N/A                                  | LCA modelling (empiric data from interviews and other studies) | cradle to farmgate                                                               | Spain                             | cereals <sup>2</sup>          | 1.024                                      | 361     | 45% <sup>3</sup>    |
|                                                                                                          |                                                                |                                                                                  |                                   | legumes                       | 568                                        | 232     |                     |
|                                                                                                          |                                                                |                                                                                  |                                   | field vegetables <sup>4</sup> | 3.448                                      | 1.418   |                     |
|                                                                                                          |                                                                |                                                                                  |                                   | vegetables greenhouse         | 11.841                                     | 7.592   |                     |
| Aguilera et al. (2015 b) <sup>41</sup><br>p. 730<br>data collected: 2012 (3)                             | LCA modelling (empiric data from interviews and other studies) | cradle to farmgate                                                               | Spain                             | citrus fruits <sup>5</sup>    | 6.324                                      | 1.897   | 49%                 |
|                                                                                                          |                                                                |                                                                                  |                                   | fruits                        | 2.597                                      | 1.480   |                     |
|                                                                                                          |                                                                |                                                                                  |                                   | wine                          | 964                                        | 641     |                     |
| Cooper et al. (2011) <sup>42</sup><br>p. 189<br>data collected: 2004-2007 (5,5)                          | empiric data gathered at site                                  | direct and indirect emissions until farmgate; comparable with cradle to farmgate | Nafferton (Northern England), UK  | crop rotation <sup>6</sup>    | 2.019                                      | 841     | 42%                 |
| Küstermann et al. (2008) <sup>43</sup><br>p. 48<br>data collected: 1999-2002 (7,5)                       | modelling (software REPRO)                                     | direct and indirect inputs until farmgate; comparable with cradle to farmgate    | Scheyern (Upper Bavaria), Germany | crop rotation <sup>7,8</sup>  | 376                                        | 263     | 70%                 |
| Reitmayer et al. (1995) <sup>44</sup><br>(as quoted in Stolze et al. 2000, p. 55)<br>data collected: N/A |                                                                |                                                                                  | Germany                           | winter wheat                  | 1.001                                      | 429     | 63%                 |
|                                                                                                          |                                                                |                                                                                  |                                   | potatoes                      | 1.153                                      | 958     |                     |

<sup>1</sup> The specific regional coverage was not stated in all studies. Locations are stated as precisely as possible.

<sup>2</sup> We have excluded the in underlying study (Aguilera et al. 2011a) observed food category 'rice' for this assessment as it is an irrelevant product for the assessment of the German agricultural sector.

<sup>3</sup> When there was more than one food category assessed in one study, we weighted them equally to not interfere with the weighting system between the studies.

<sup>4</sup> In GEMIS 'field vegetables' constitutes a collective term describing vegetables that are grown in the open air. This form of cultivation is in contrast to the horticultural cultivation of vegetables which uses greenhouses, foil tunnels or other artificially protected areas.

<sup>5</sup> We have excluded the in underlying study (Aguilera et al. 2011b) observed food categories 'subtropical fruit trees', 'tree nuts', and 'olives' as they are irrelevant products for the assessment of the German agricultural sector.

<sup>6</sup> Rotation includes winter wheat, potatoes, beans, cabbage, and spring/winter barley.

<sup>7</sup> Rotation includes potatoes, winter wheat, sunflower, winter rye, and maize.

<sup>8</sup> Even if sunflower is irrelevant to the assessment of the German foodstuff it is, however, crucial for the underlying crop rotation and farming processes and was therefore not excludable from assessment.

|                                                                                            |                                                                                                                                                       |                                                                                                                              |                                       |                           |        |        |            |
|--------------------------------------------------------------------------------------------|-------------------------------------------------------------------------------------------------------------------------------------------------------|------------------------------------------------------------------------------------------------------------------------------|---------------------------------------|---------------------------|--------|--------|------------|
| Tuomisto et al. (2012) <sup>45</sup><br>SI table S.1<br>data collected:<br>2001-2008 (7,5) | LCA modelling<br>(data from previous<br>studies and<br>empirical data)                                                                                | Indirect <sup>9</sup> and<br>direct inputs until<br>farmgate;<br>comparable with<br>cradle to<br>farmgate                    | UK                                    | winter wheat              | 1.772  | 629    | 36%        |
| <b>Animal-based</b>                                                                        |                                                                                                                                                       |                                                                                                                              |                                       |                           |        |        | <b>84%</b> |
| Basset-Mens, Wertf<br>(2005) <sup>46</sup><br>data collected: 1996-<br>2001 (6,5)          | LCA modelling<br>(data from other<br>studies)                                                                                                         | direct and<br>indirect inputs<br>and effects;<br>comparable with<br>cradle to<br>farmgate                                    | France (Bretagne)                     | pig                       | 4236   | 4022   | 95%        |
| Casey, Holden<br>(2006) <sup>47</sup><br>data collected:<br>N/A                            | LCA modelling<br>(data from<br>questionnaires and<br>other studies)                                                                                   | cradle to<br>farmgate                                                                                                        | Ireland                               | beef                      | 5346   | 2302   | 82%        |
| Flessa et al. (2002) <sup>48</sup><br>data collected:<br>1994-1998 (6)                     | modelling<br>(on basis of<br>empirical data and<br>other studies)                                                                                     | direct inputs and<br>limited <sup>10</sup><br>indirect inputs<br>until farmgate;<br>comparable with<br>cradle to<br>farmgate | Germany,<br>Oberbayern (South)        | beef/cattle               | 4177   | 3037   | 73%        |
| <b>Dairy</b>                                                                               |                                                                                                                                                       |                                                                                                                              |                                       |                           |        |        | <b>63%</b> |
| Bos et al. (2007) <sup>49</sup><br>data collected:<br>N/A                                  | modelling<br>(model DairyWise)                                                                                                                        | indirect and<br>direct emissions;<br>comparable with<br>cradle to<br>farmgate                                                | Netherlands                           | dairy                     | 11     |        | 61%        |
| <i>Dalgaard et al.</i><br>(2006) <sup>50</sup><br>data collected:<br>1999 (7)              | LCA modelling<br>(based on empirical<br>data from 2138<br>private farm<br>accounts)                                                                   | cradle to<br>farmgate <sup>12</sup>                                                                                          | Denmark                               | dairy; sandy soil         | 6.335  | 5.459  | 57%        |
|                                                                                            |                                                                                                                                                       |                                                                                                                              |                                       | dairy; sandy loam<br>soil | 5.803  | 1.669  |            |
| Haas et al. (2001) <sup>51</sup><br>data collected:<br>1998 (3)                            | LCA modelling<br>(based on empirical<br>data from 35 farms<br>in the region)                                                                          | direct and<br>upstream<br>(indirect)<br>processes;<br>comparable with<br>cradle to<br>farmgate                               | Germany, Allgäu<br>(Southern Bavaria) | dairy                     | 9.400  | 6.300  | 67%        |
| <i>Thomassen et al.</i><br>(2008) <sup>52</sup><br>data collected:<br>2003 (5)             | LCA modelling<br>(based on empirical<br>data from field<br>studies of 10<br>conventional and<br>11 organic farms,<br>and data of<br>previous studies) | cradle to<br>farmgate                                                                                                        | Netherlands                           | dairy                     | 20.598 | 13.405 | 65%        |

<sup>9</sup> Tuomisto et al. (2012) and Flessa et al. (2002) explicitly state that the production of farm buildings is not considered. However, as far as it was comprehensible, all other studies have similarly not included assessment of housing production.

<sup>10</sup> Production of fertilizer was considered; other indirect inputs for precursors like pesticides and seeds were not included as they were considered negligible; infrastructure (machines and buildings) was not included. This studies system boundaries are least in line with our assessment scope but are still comparable due to the explanation as to why certain processes were excluded.

<sup>11</sup> As Bos et al. (2007) reports „GHG emissions per ha on the conventional dairy farms are 65% higher than on the organic model farms.” (p.3). We set organic as 100% and conventional as 165%.

<sup>12</sup> Authors refer to cradle to grave approach when introducing to the topic of LCA. They continue although with cradle to farmgate assessments of nitrogen surpluses, for example. The input data does also not include processes after farmgate. Therefore, we find this approach to be comparable with cradle to farmgate.

## Supplementary Table 2

### Original GEMIS data (kgGas/kgProd)

| <u>Name</u>      | <u>name (in GEMIS)</u> | <u>category (in GEMIS)</u> | <u>production-level (in GEMIS)</u> | <u>Code</u>                         | <u>CO2-eq</u> |
|------------------|------------------------|----------------------------|------------------------------------|-------------------------------------|---------------|
| field-vegetables | Feldgemüse             | Gemüse                     | Anbau                              | AnbauFeldgemüse-DE-2010             | 0.0328        |
| Tomatoes         | Tomate                 | Gemüse                     | Anbau                              | AnbauTomate-DE-2010                 | 0.3943        |
| Fruit            | Obst                   | Obst                       | Anbau                              | AnbauObst-DE-2010                   | 0.2531        |
| Rye              | Roggen                 | Getreideerzeugnisse        | Anbau                              | AnbauRoggen-DE-2010                 | 0.2204        |
| Wheat            | Weizen-Körner          | Getreideerzeugnisse        | Anbau                              | AnbauWeizen-Körner-DE-2010          | 0.3757        |
| Oat              | Hafer                  | Getreideerzeugung          | Anbau                              | AnbauHafer-DE-2010                  | 0.3605        |
| Barley           | Gerste                 | Getreideerzeugung          | Anbau                              | AnbauGerste-DE-2010                 | 0.3335        |
| Potatoes         | Kartoffeln             | Gemüse                     | Anbau                              | AnbauKartoffel-DE-2010              | 0.0648        |
| Beans            | Bohnen                 | Gemüse                     | Anbau                              | AnbauFeldgemüse-DE-2010             | 0.0328        |
| Rapeseed         | Rapsöl                 | Raps-Öl                    | NG-Herstellung                     | NG-HerstellungRapsöl-DE-2010        | 1.0192        |
| Eggs             | Eier                   | Eier                       | Tierhaltung<br>Legehenne           | TierhaltungLegehenne(Ei)-DE-2010    | 1.1711        |
| Broilers         | Masthähnchen           | Fleisch                    | NG-Schlachtere<br>i                | NG-Schlachtereide-Masthähnchen-2010 | 13.1718       |
| Beef             | Rind                   | Fleisch                    | NG-Schlachtere<br>i                | NG-Schlachtereide-Rind-2010         | 24.8637       |
| Pork             | Schwein                | Fleisch                    | NG-Schlachtere<br>i                | NG-Schlachtereide-Schwein-2010      | 5.5486        |
| Milk             | Milch                  | Milchprodukte              | Tierhaltung<br>Milchkuh            | TierhaltungMilchkuh(Milch)-DE-2010  | 1.0958        |
